# Supplementary material for: Considerations about the implementation of an autism screening program in Iran from the viewpoints of professionals and parents: a qualitative study
Source: Springer Nature journal article supplement (doi:10.1186/s12888-021-03061-0), 2021-01-23
Supplement: MOESM2 [file 18794258]

## Additional File 2: Interview Protocol Form

Title: **Considerations about the Implementation of an Autism Screening Program in Iran from the Viewpoints of Professionals and Parents: A Qualitative Study**

Date \_\_\_\_\_

Time \_\_\_\_\_

Location \_\_\_\_\_

Interviewer \_\_\_\_\_

Interviewee \_\_\_\_\_

### Participants' Characteristics

Gender: Female  Male

Age: .....

Job: .....

Years of Job Experiences: .....

### Would you like to participate in this interview?

Informed consent was obtained from the study participant

Informed consent was NOT obtained from the study participant

### Notes to interviewee:

Thank you for your participation. I believe your input will be valuable to this research and in helping grow all of our professional practice. Obviously, the information contained in the questionnaire is completely confidential. Participation in the survey is completely voluntary and will not affect you. We sincerely thank and appreciate the fact that you are helping the researchers with honesty and openness in commenting. Approximate length of interview: 30 minutes, five major questions.

### Research questions:

1. What are your viewpoints regarding the ASD screening programs?
2. What are your viewpoints regarding the implementation of the ASD universal screening in Iran?
  - Benefits
  - Disadvantages
3. What challenges does an ASD universal screening face in Iran especially East-Azerbaijan?
4. What are your suggestions to overcome the challenges?
5. *And so forth*
