# Supplementary material for: Considerations about the implementation of an autism screening program in Iran from the viewpoints of professionals and parents: a qualitative study
Source: Springer Nature journal article supplement (doi:10.1186/s12888-021-03061-0), 2021-01-23

### Additional File 3: Theme-tree

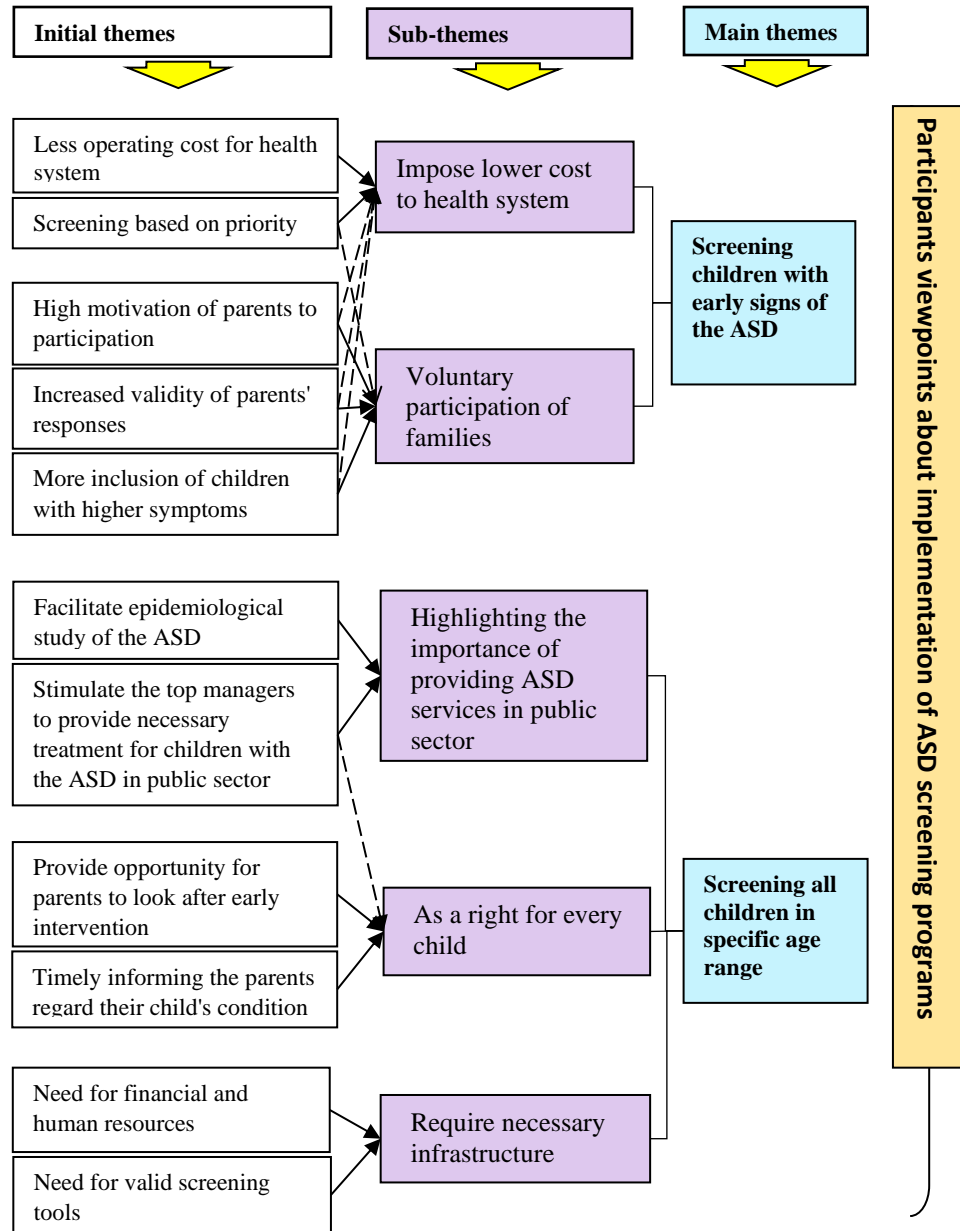

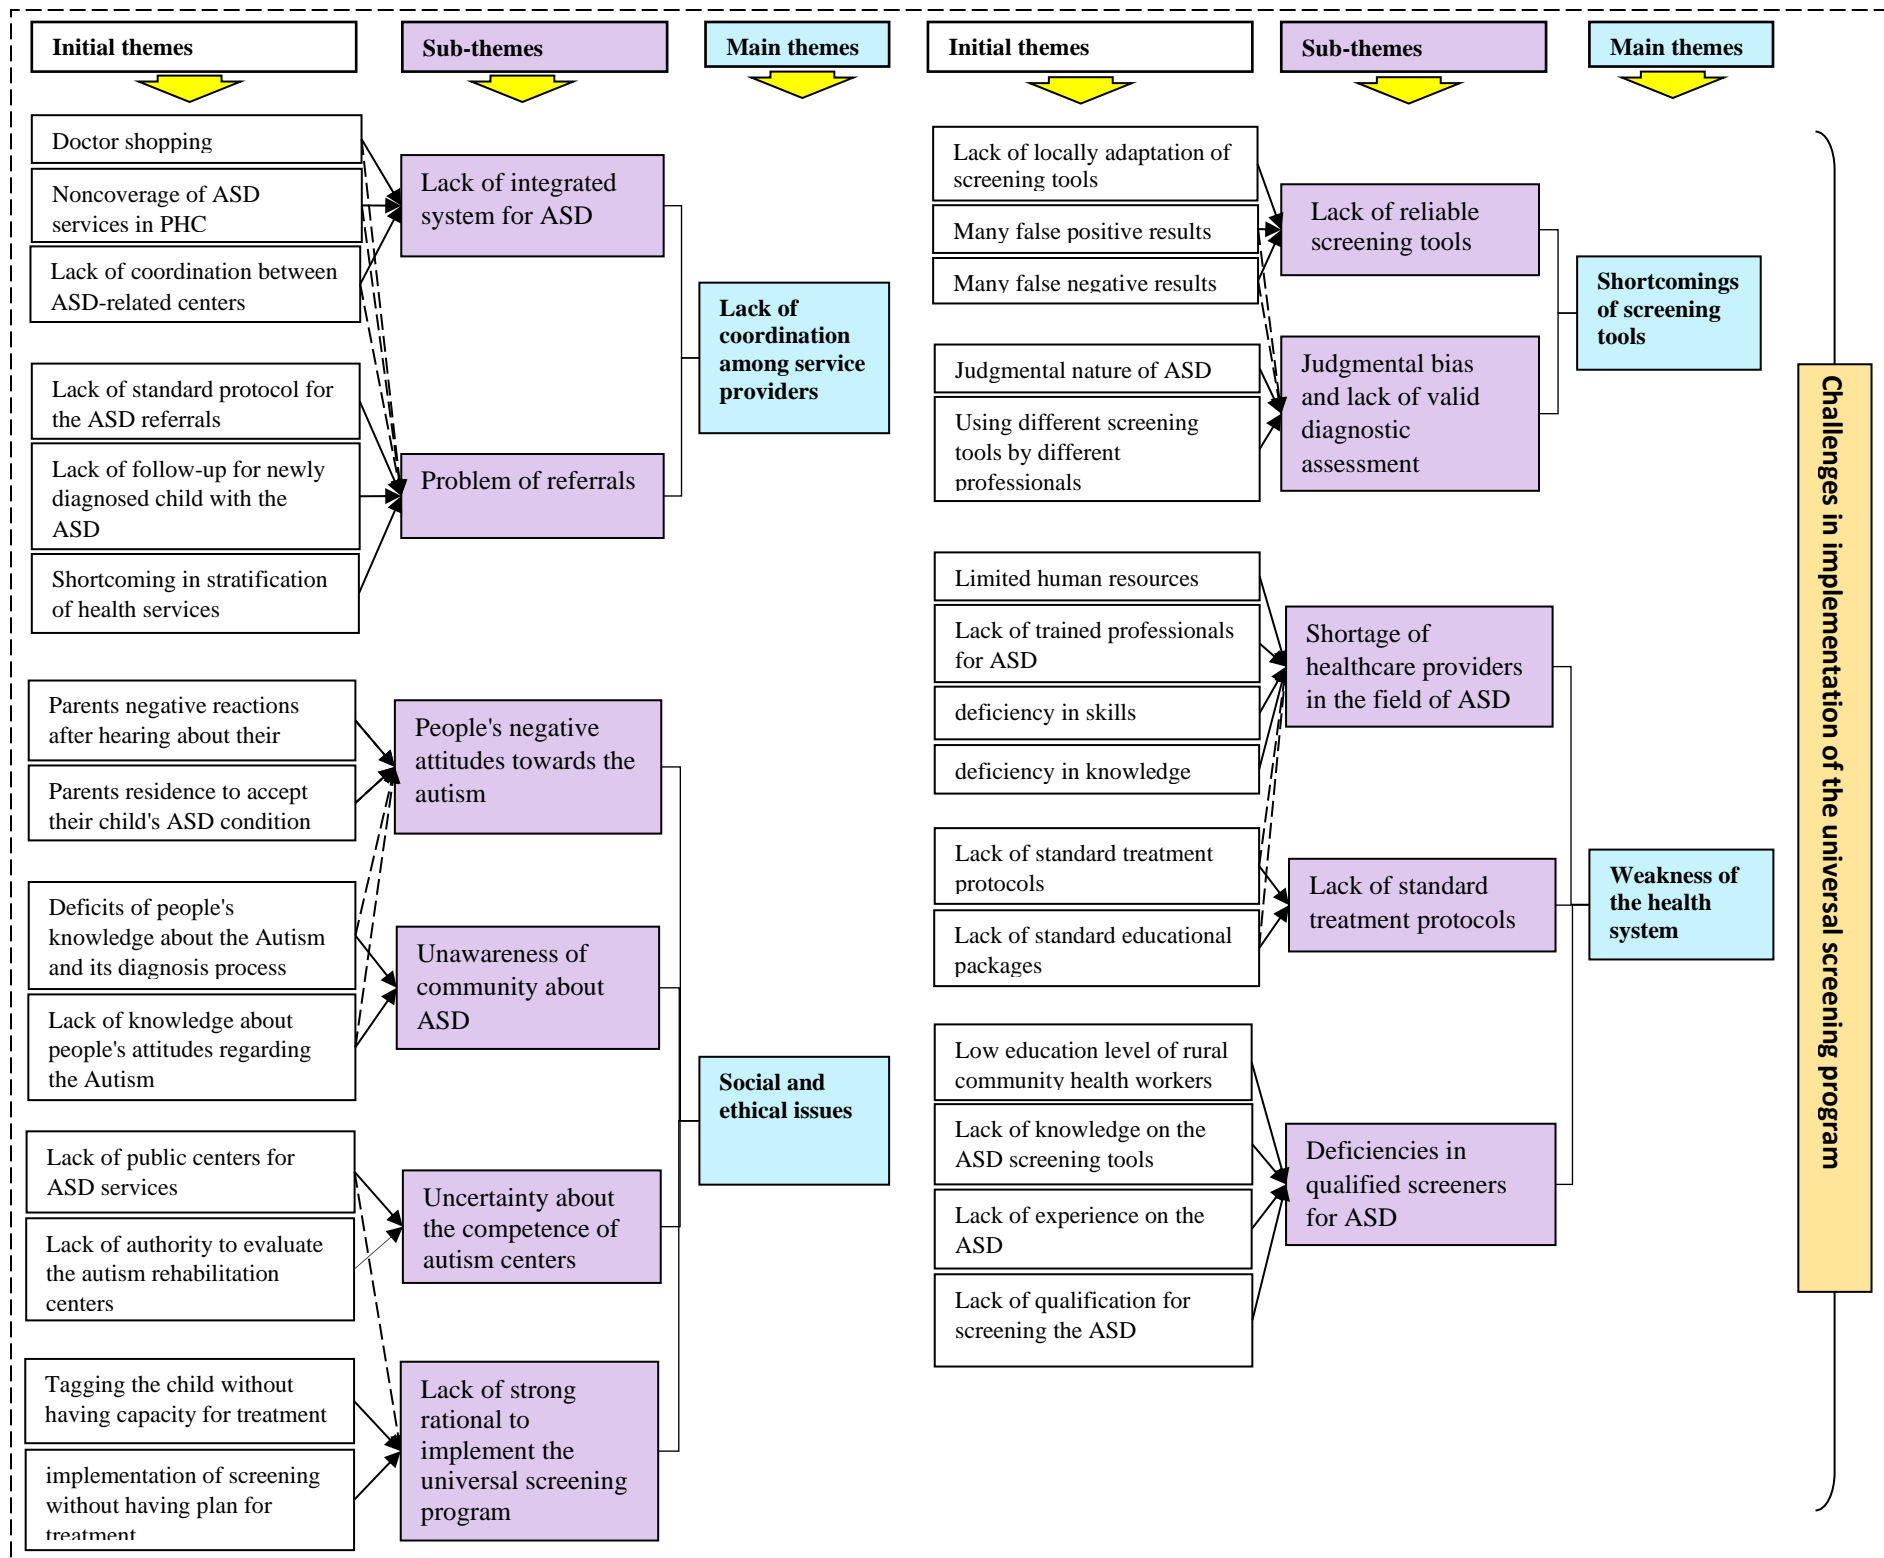

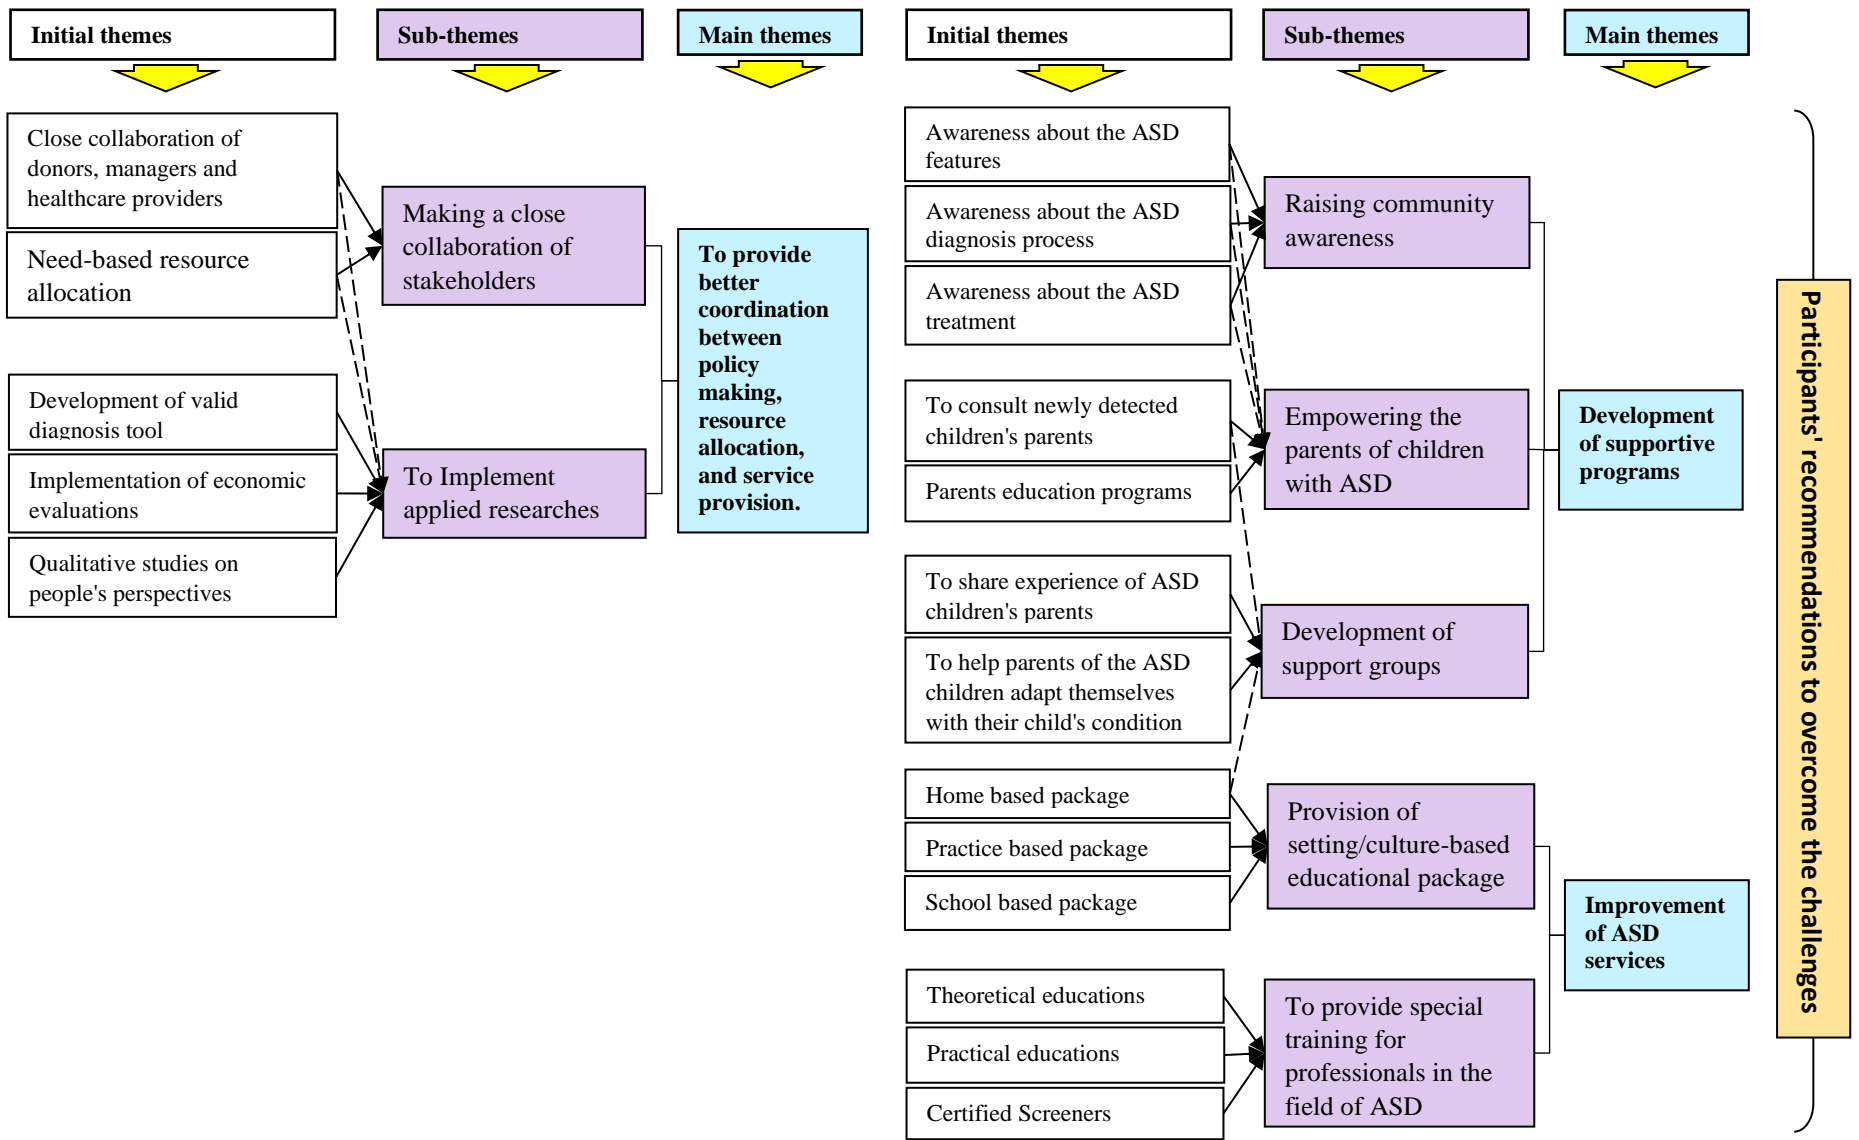

Supplement: MOESM3 [file 18794258]
